# Supplementary material for: Diversified magnetic behaviors of new nickel(ii) and copper(ii) azido coordination polymers templated by diethyl or triethyl amines
Source: Royal Society of Chemistry journal article supplement (doi:10.1039/c6nj03268k), 2016-12-22
Supplement: c6nj03268k1.pdf [file c6nj03268k1.pdf]

*Electronic Supplementary Information (ESI)*

**Diversified magnetic behaviors in new nickel(II) and copper(II) azido coordination polymers templated by diethyl or triethyl amines**

Ying Zeng,<sup>a</sup> Sui-Jun Liu,<sup>\*b</sup> Cai-Ming Liu,<sup>\*c</sup> Yong-Rong Xie,<sup>a</sup> and Zi-Yi Du<sup>\*a</sup>

<sup>a</sup>*Key Laboratory of Jiangxi University for Functional Materials Chemistry, College of Chemistry and Chemical Engineering, Gannan Normal University, Ganzhou 341000, P. R. China*

<sup>b</sup>*School of Metallurgy and Chemical Engineering, Jiangxi University of Science and Technology, Ganzhou 341000, P. R. China*

<sup>c</sup>*Beijing National Laboratory for Molecular Sciences, Center for Molecular Science, Institute of Chemistry, Chinese Academy of Sciences, Beijing, 100190, P. R. China*

\*Corresponding author. E-mail: liusuijun147@163.com; cmliu@iccas.ac.cn; ziyidu@gmail.com.

**Table S1.** Summary of crystal data and structural refinements for **1 - 3**.

| Compound                                      | <b>1</b>                                                      | <b>2</b>                                                       | <b>3</b>                                                       |
|-----------------------------------------------|---------------------------------------------------------------|----------------------------------------------------------------|----------------------------------------------------------------|
| Empirical formula                             | C <sub>6</sub> H <sub>16</sub> N <sub>8</sub> Ni <sub>1</sub> | C <sub>4</sub> H <sub>12</sub> N <sub>22</sub> Cu <sub>3</sub> | C <sub>6</sub> H <sub>16</sub> N <sub>28</sub> Cu <sub>4</sub> |
| Formula weight                                | 258.98                                                        | 558.98                                                         | 734.63                                                         |
| Space group                                   | <i>P</i> 2 <sub>1</sub> / <i>c</i>                            | <i>P</i> -1                                                    | <i>P</i> -1                                                    |
| <i>a</i> (Å)                                  | 10.4040(8)                                                    | 6.8322(2)                                                      | 8.6636(6)                                                      |
| <i>b</i> (Å)                                  | 7.9731(6)                                                     | 11.3756(4)                                                     | 11.8031(8)                                                     |
| <i>c</i> (Å)                                  | 13.523(1)                                                     | 12.5900(4)                                                     | 11.9525(8)                                                     |
| <i>α</i> /deg                                 | 90                                                            | 79.412(2)                                                      | 91.650(1)                                                      |
| <i>β</i> /deg                                 | 97.113(1)                                                     | 89.080(2)                                                      | 94.884(1)                                                      |
| <i>γ</i> /deg                                 | 90                                                            | 75.553(2)                                                      | 91.011(1)                                                      |
| <i>V</i> /Å <sup>3</sup>                      | 1113.1(2)                                                     | 930.97(5)                                                      | 1217.0(2)                                                      |
| <i>Z</i>                                      | 4                                                             | 2                                                              | 2                                                              |
| <i>D</i> <sub>calcd</sub> /g cm <sup>-3</sup> | 1.545                                                         | 1.994                                                          | 2.005                                                          |
| <i>μ</i> /mm <sup>-1</sup>                    | 1.727                                                         | 3.443                                                          | 3.508                                                          |
| GOF on F <sup>2</sup>                         | 1.014                                                         | 1.014                                                          | 1.053                                                          |
| R1, wR2 [ <i>I</i> >2σ( <i>I</i> )]           | 0.0220, 0.0525                                                | 0.0252, 0.0650                                                 | 0.0184, 0.0457                                                 |
| R1, wR2 (all data)                            | 0.0283, 0.0551                                                | 0.0275, 0.0665                                                 | 0.0208, 0.0467                                                 |

$$R1 = \sum ||F_o| - |F_c|| / \sum |F_o|, wR2 = \{ \sum w[(F_o)^2 - (F_c)^2]^2 / \sum w[(F_o)^2]^2 \}^{1/2}$$

**Table S2.** Selected bond lengths (Å) in **1-3**.

| <b>1</b>        |          |                 |          |
|-----------------|----------|-----------------|----------|
| Ni(1)–N(7)      | 2.061(1) | Ni(1)–N(3)#1    | 2.109(1) |
| Ni(1)–N(4)#2    | 2.113(1) | Ni(1)–N(1)      | 2.123(1) |
| Ni(1)–N(4)      | 2.145(1) | Ni(1)–N(8)      | 2.223(1) |
| <b>2</b>        |          |                 |          |
| Cu(1)–N(1)      | 1.972(2) | Cu(1)–N(7)      | 1.986(2) |
| Cu(1)–N(1)#2    | 1.997(2) | Cu(1)–N(4)      | 2.015(2) |
| Cu(1)···N(6)#3  | 2.659(4) | Cu(2)–N(7)      | 1.979(2) |
| Cu(2)–N(10)     | 1.992(2) | Cu(2)–N(16)     | 1.998(2) |
| Cu(2)–N(13)     | 2.007(2) | Cu(2)···N(13)#4 | 2.593(2) |
| Cu(2)···N(15)#5 | 2.779(3) | Cu(3)–N(19)     | 1.961(2) |
| Cu(3)–N(4)#3    | 2.016(2) | Cu(3)–N(16)     | 2.024(2) |
| Cu(3)–N(13)     | 2.042(2) | Cu(3)···N(10)#4 | 2.548(3) |
| Cu(3)···N(12)#5 | 2.556(2) |                 |          |
| <b>3</b>        |          |                 |          |
| Cu(1)–N(1)      | 2.004(2) | Cu(1)–N(7)      | 2.036(2) |
| Cu(1)···N(4)#4  | 2.513(2) | Cu(2)–N(25)     | 1.977(2) |
| Cu(2)–N(16)     | 2.021(2) | Cu(3)–N(10)     | 1.990(2) |
| Cu(3)–N(13)     | 2.000(2) | Cu(3)–N(7)      | 2.010(2) |
| Cu(3)–N(22)     | 2.023(2) | Cu(3)···N(4)#4  | 2.436(2) |
| Cu(4)–N(19)     | 1.993(2) | Cu(4)–N(19)#3   | 2.000(2) |
| Cu(4)–N(10)     | 2.016(2) | Cu(4)–N(16)     | 2.025(2) |
| Cu(4)···N(25)#2 | 2.332(2) | Cu(5)–N(1)#4    | 1.978(2) |
| Cu(5)–N(13)     | 1.998(2) | Cu(5)–N(4)      | 2.013(2) |
| Cu(5)–N(22)     | 2.027(2) | Cu(5)···N(27)   | 2.491(2) |
| Cu(5)···N(13)   | 2.668(2) |                 |          |

Symmetry codes: #1  $-x + 1, y + 1/2, -z + 1/2$ ; #2  $-x + 1, -y + 1, -z$ ; #3.  $-x + 2, -y + 1, -z$ ; #4.  $-x + 1, -y + 2, -z$ ; #5.  $-x, -y + 2, -z$ .

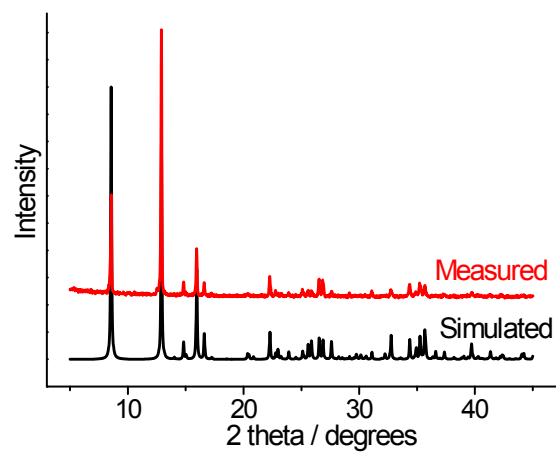

(a)

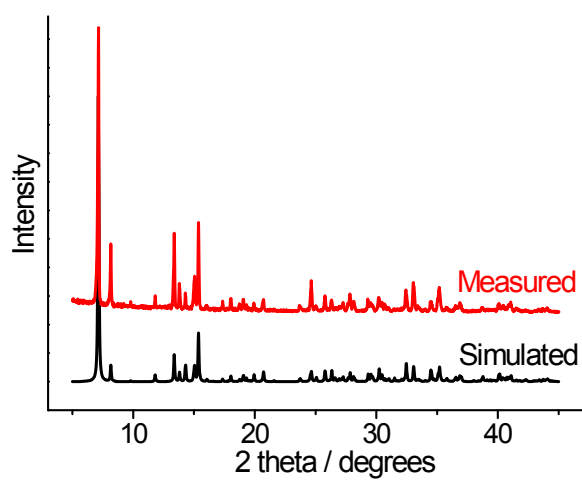

(b)

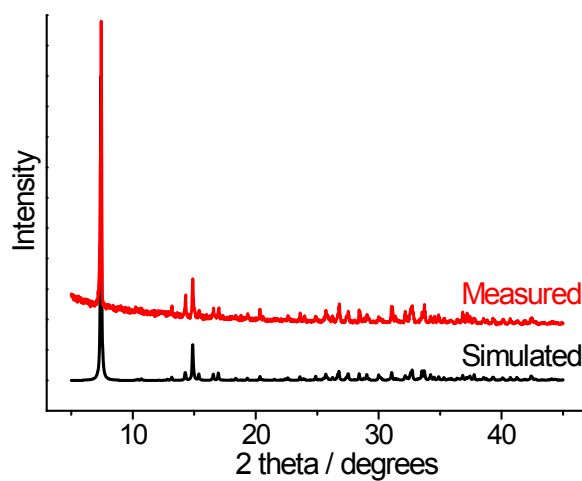

(c)

**Fig. S1.** Simulated and experimental XRD powder patterns for **1** (a), **2** (b), and **3** (c), respectively.

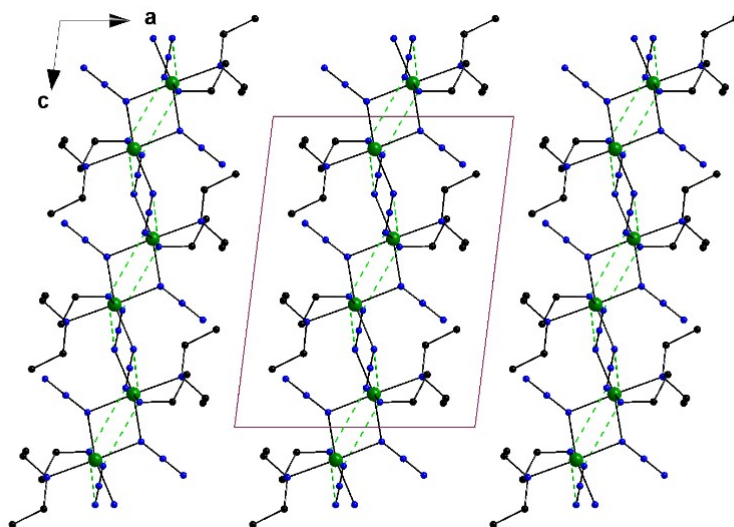

**Fig. S2.** View of the structure of **1** down the *b*-axis. the N...N hydrogen bonds are drawn as green dashes. For other display details, see the caption for Fig. 1.

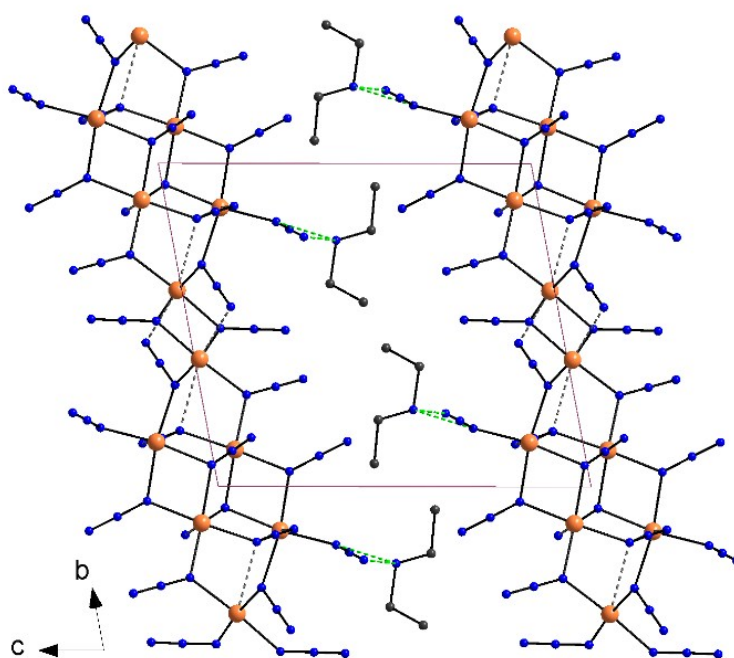

**Fig. S3.** View of the structure of **2** down the *a*-axis. The weak Cu–N bonds with the bond lengths longer than 2.40 Å and the N...N hydrogen bonds are drawn as dark grey and green dashes, respectively. For other display details, see the caption for Fig. 2.

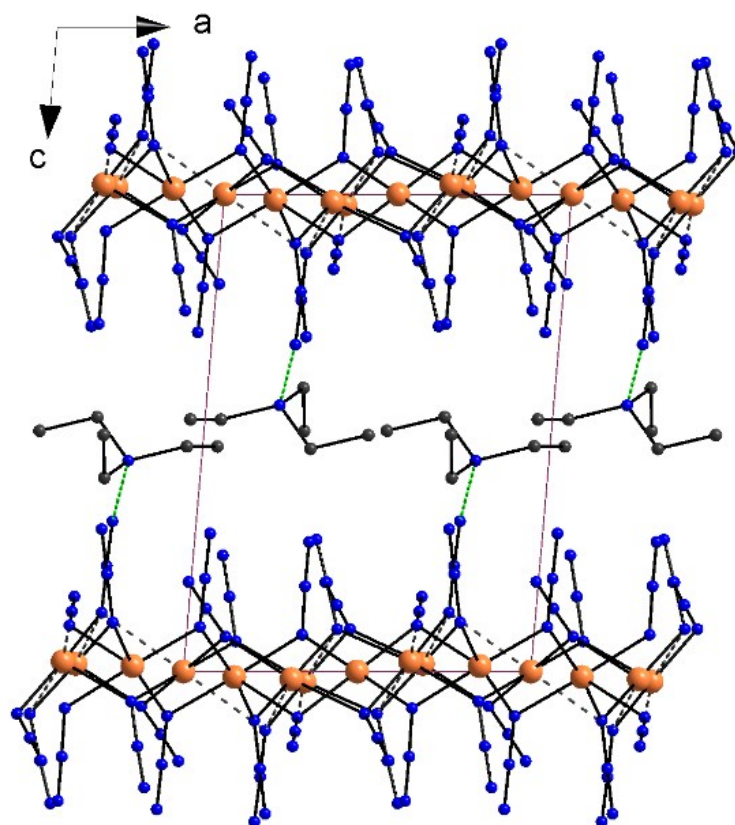

**Fig. S4.** View of the structure of **3** down the *b*-axis. For display details, see the caption for Fig. S3.

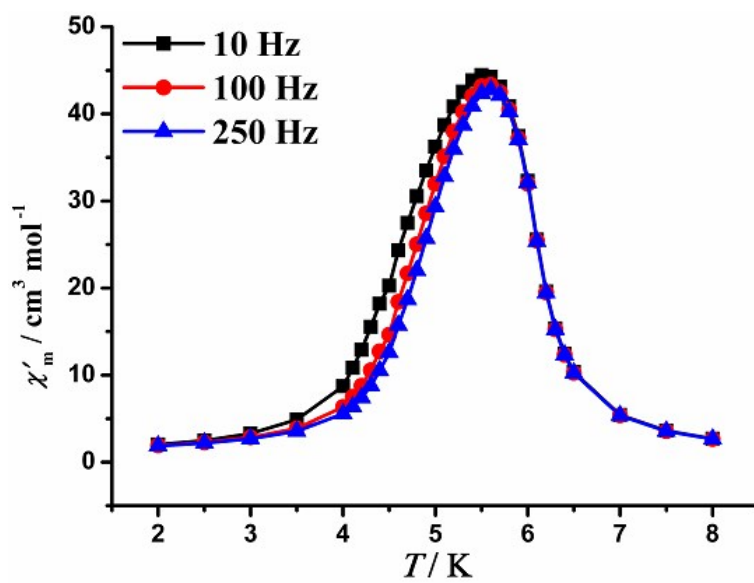

**Fig. S5.** The in-phase signals with  $H_{dc} = 0$  Oe for **2**.

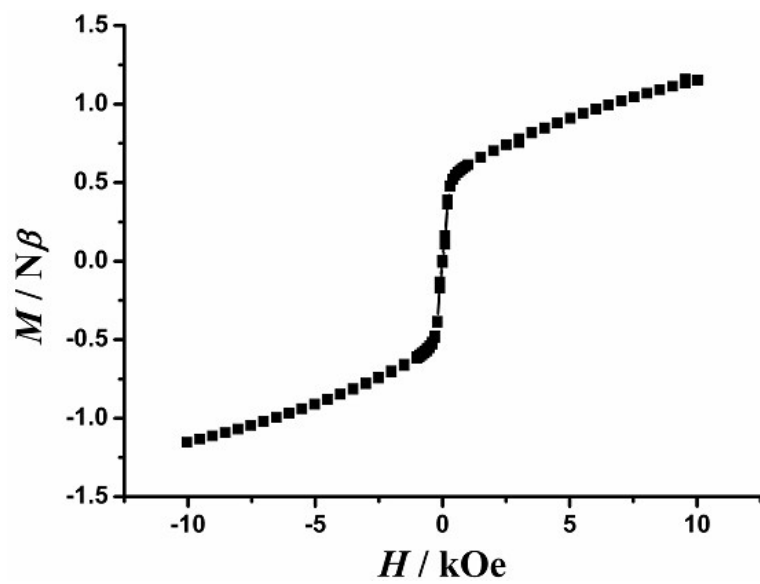

(a)

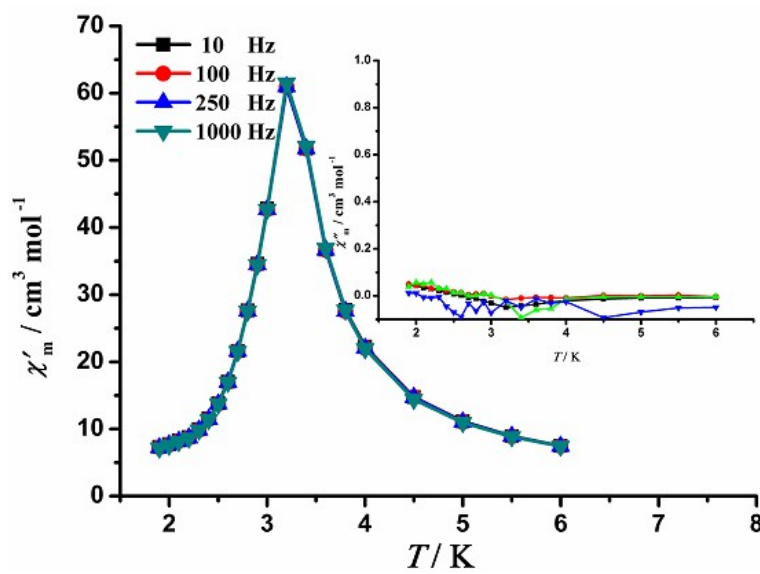

(b)

**Fig. S6.** Field dependence of the magnetization of **3** measured at 2 K (a), and temperature dependence of the ac  $\chi_m$  at different frequencies for **3** with  $H_{dc} = 0$  Oe (b).
